# Supplementary material for: Evaluating the ecological hypothesis: Early life salivary microbiome assembly predicts dental caries in a longitudinal case-control study
Source: Research Square preprint supplement (doi:10.21203/rs.3.rs-848589/v2), 2022-05-10
Supplement: Supplementary file 1 [file 227274e2e99bd03633d7ef19.xlsx]

## Sheet: Sheet 1
var_label
